# Supplementary material
Source: MDPI journal article supplement (https://www.mdpi.com/1424-2818/13/9/455)
Supplement: s1 [file s1]

## Supporting information

Diversity and Distribution of Culturable *Thermus* Species in Terrestrial Hot Springs of Southwestern Yunnan Province in China

Yong-Xia Wang<sup>1</sup>, Qin He<sup>1</sup>, Long Han<sup>1</sup>, Yi-Ting Zhao<sup>1</sup>, Cheng-Peng Li<sup>1</sup>, Wei Xiao<sup>1</sup>, Xiao-Long Cui<sup>1, 2\*</sup>

<sup>1</sup>Yunnan Institute of Microbiology, School of Life Sciences, Yunnan University, Kunming, Yunnan 650091, People's Republic of China (P. R. China)

<sup>2</sup>State Key Laboratory for Conservation and Utilization of Bio-Resources in Yunnan, Yunnan University, Kunming, Yunnan 650091, People's Republic of China (P. R. China)

### Corresponding author

Xiao-Long Cui

E-mail: xlcui@ynu.edu.cn

<sup>1</sup>Yunnan Institute of Microbiology, School of Life Sciences, Yunnan University, Kunming, Yunnan 650091, People's Republic of China (P. R. China)

<sup>2</sup> State Key Laboratory for Conservation and Utilization of Bio-Resources in Yunnan, Yunnan University, Kunming, Yunnan 650091, People's Republic of China (P. R. China)

**Table S1** The *Thermus*-like bacteria in each OTU from four geothermal regions at cutoff 0.03.

**Table S1.** The *Thermus*-like bacteria in each OTU from four geothermal regions at cutoff 0.03.

| OTUs | Lc                                                                                                                                                                     | Bs                                                                                                                                                                                                                                                                                                                                                                                                               | DI                                                                                                                                                                                                   | Dh                                                                                                       |
|------|------------------------------------------------------------------------------------------------------------------------------------------------------------------------|------------------------------------------------------------------------------------------------------------------------------------------------------------------------------------------------------------------------------------------------------------------------------------------------------------------------------------------------------------------------------------------------------------------|------------------------------------------------------------------------------------------------------------------------------------------------------------------------------------------------------|----------------------------------------------------------------------------------------------------------|
| OTU1 | YIM 0635-1, YIM 0614-1, YIM 0635-3,<br>YIM 0614-7, YIM 0613-1, YIM 0511-2,<br>YIM 0634-4, YIM 0623-4, YIM 0633-1,<br>YIM 0634-3, YIM 0624-3, YIM 0435-3,<br>YIM 0434-2 | YIM 8C34-5, YIM 8B32-4, YIM 8A13-1,<br>YIM 8C14-4, YIM 8C34-6, YIM 8A34-1,<br>YIM 8A33-1, YIM 8C12-3, YIM 8A15-3,<br>YIM 8A13-4, YIM 8C34-2, YIM 8A33-4,<br>YIM 8C34-7, YIM 8B32-5, YIM 8C13-5,<br>YIM 8A14-2, YIM 8C14-3, YIM 8C34-1,<br>YIM 8C13-3, YIM 8A34-2, YIM 8B12-7,<br>YIM 8A23-5, YIM 8C34-3, YIM 8C13-1,<br>YIM 8C13-2, YIM 8B12-6, YIM 8C32-6,<br>YIM 8C14-2, YIM 8A15-1, YIM 8C13-6,<br>YIM 8B12-5 | YIM 17A34-2                                                                                                                                                                                          |                                                                                                          |
| OTU2 | YIM 0435-1, YIM 0435-4, YIM 0434-5,<br>YIM 0535-2, YIM 0435-5, YIM 0514-1,<br>YIM 0535-3, YIM 0514-2, YIM 0535-1,<br>YIM 0535-4, YIM 0515-4,                           | YIM 8A15-2, YIM 8C14-5, YIM 8A35-3,<br>YIM 8C14-1, YIM 8A35-2, YIM 8B12-8,<br>YIM 8A14-3, YIM 8A14-4, YIM 8A13-3,                                                                                                                                                                                                                                                                                                | YIM 1834-1, YIM 1812-1, YIM 1833-4,<br>YIM 1832-4, YIM 1834-2, YIM 1813-3,<br>YIM 1832-1, YIM 1814-4, YIM 1815-2,<br>YIM 1814-1, YIM 1814-3, YIM 1813-4,<br>YIM 17A13-3                              | YIM 1313-5                                                                                               |
| OTU3 | YIM 0635-4, YIM 0612-2, YIM 0613-4,<br>YIM 0623-1, YIM 0625-2                                                                                                          |                                                                                                                                                                                                                                                                                                                                                                                                                  |                                                                                                                                                                                                      | YIM 1334-1, YIM 1322-1,<br>YIM 1314-2, YIM 1324-4,<br>YIM 1312-4, YIM 1333-4,<br>YIM 1334-4, YIM 1314-5, |
| OTU4 | YIM 0435-2, YIM 0613-3, YIM 0615-2,                                                                                                                                    |                                                                                                                                                                                                                                                                                                                                                                                                                  | YIM 1833-5, YIM 1814-2, YIM 1833-6,<br>YIM 17A34-3, YIM 1832-3, YIM 1833-1,<br>YIM 1835-4, YIM 1835-6, YIM 1835-5,<br>YIM 17A12-3, YIM 17A33-2, YIM 17A33-<br>1, YIM 1834-5, YIM 1833-3, YIM 1813-5, |                                                                                                          |

YIM 1835-2, YIM 1835-3, YIM 17A34-4,  
YIM 17A14-1, YIM 17A34-1, YIM 17A13-  
2, YIM 1813-6, YIM 17A32-4, YIM 1813-  
2, YIM 17A14-2, YIM 17A13-1, YIM 1834-  
4, YIM 17A14-3, YIM 1833-2, YIM 17A32-  
62

|      |                                                                                                                                                                                                                                                                                                                                                                                                     |                                     |                                                                                                                                                                                                                                                               |
|------|-----------------------------------------------------------------------------------------------------------------------------------------------------------------------------------------------------------------------------------------------------------------------------------------------------------------------------------------------------------------------------------------------------|-------------------------------------|---------------------------------------------------------------------------------------------------------------------------------------------------------------------------------------------------------------------------------------------------------------|
| OTU5 | YIM 0514-4,                                                                                                                                                                                                                                                                                                                                                                                         | YIM 8C33-2, YIM 8C34-4, YIM 8C13-4, | YIM 1332-1                                                                                                                                                                                                                                                    |
| OTU6 | YIM 0533-2, YIM 0513-5, YIM 0623-2,<br>YIM 0514-3, YIM 0534-2, YIM 0512-1,<br>YIM 0414-2, YIM 0434-3, YIM 0434-1,<br>YIM 0635-5, YIM 0614-5, YIM 0634-2,<br>YIM 0615-1, YIM 0622-2, YIM 0513-1,<br>YIM 0534-1, YIM 0533-6, YIM 0515-5,<br>YIM 0532-4, YIM -0533-4, YIM 0513-6,<br>YIM 0414-3, YIM 0625-1, YIM 0534-4,<br>YIM 0434-4, YIM 0624-2, YIM -0435-7,<br>YIM 0633-2, YIM 0514-5, YIM 0625-3 |                                     | YIM 1315-3, YIM 1314-3,<br>YIM 1325-1, YIM 1315-2,<br>YIM 1312-2, YIM 1332-2,<br>YIM 1315-4, YIM 1325-2,<br>YIM 1323-1, YIM 1333-2,<br>YIM 1333-3, YIM 1323-2,<br>YIM 1324-3, YIM 1335-1,<br>YIM 1335-2, YIM 1325-3,<br>YIM 1315-6, YIM 1323-3,<br>YIM 1315-1 |
| OTU7 |                                                                                                                                                                                                                                                                                                                                                                                                     | YIM 8C33-1, YIM 8A13-2, YIM 8A32-2, | YIM 1313-3                                                                                                                                                                                                                                                    |
| OTU8 | YIM 0633-3, YIM 0634-1, YIM 0622-1,<br>YIM 0614-4, YIM 0614-2, YIM 0613-2,<br>YIM 0634-5, YIM 0513-2, YIM 0515-1,<br>YIM 0523-2, YIM 0532-2, YIM 0514-7,                                                                                                                                                                                                                                            |                                     |                                                                                                                                                                                                                                                               |

|       |                                                   |                                                                                                                                                                                                                                                                               |
|-------|---------------------------------------------------|-------------------------------------------------------------------------------------------------------------------------------------------------------------------------------------------------------------------------------------------------------------------------------|
|       | YIM 0534-3, YIM 0514-6, YIM 0534-5,<br>YIM 0515-3 |                                                                                                                                                                                                                                                                               |
| OTU9  |                                                   | YIM 8B32-3                                                                                                                                                                                                                                                                    |
| OTU10 |                                                   | YIM 8C32-5                                                                                                                                                                                                                                                                    |
| OTU11 | YIM 0613-5,                                       | YIM 8B11-5, YIM 8A21-3, YIM 8A12-1, YIM 1631-1,<br>YIM 8A11-2, YIM 8A22-1, YIM 8A21-4,<br>YIM 8A33-5, YIM 8A13-6, YIM 8A12-2,<br>YIM 8B22-2, YIM 8B11-6, YIM 8A23-2,<br>YIM 8B21-5, YIM 8A23-4, YIM 8B32-2,<br>YIM 8A23-1, YIM 8B12-1, YIM 8A22-2,<br>YIM 8A13-5, YIM 8A33-2, |
